# Supplementary material for: Effect of Omega-3 Fatty Acid Ethyl Esters on the Oxylipin Composition of Lipoproteins in Hypertriglyceridemic, Statin-Treated Subjects
Source: PubMed Central journal article supplement (PMC4230929; doi:10.1371/journal.pone.0111471), 2014-11-13
Supplement: pone.0111471.s003.pdf [file pone.0111471.s003.pdf]

**Supplemental Table 1: Least square mean (nM oxy / mM PL) and [95% CI] with treatment effects [95% CI] (adjusted for age and sex).**

| Lipo          | Chemistry  | Parent     |                | Baseline                 | Final                    | Difference<br>(% change<br>baseline) | pVal              |
|---------------|------------|------------|----------------|--------------------------|--------------------------|--------------------------------------|-------------------|
|               |            | FA         | Regioisomer    |                          |                          |                                      |                   |
| HDL           | Alc        | LA         | 9-HODE         | 460 (350, 610)           | 530 (400, 690)           | 14 (-5, 37)                          | 0.15              |
| HDL           | Alc        | LA         | 13-HODE        | 2020 (1530, 2660)        | 2320 (1760, 3060)        | .                                    | .                 |
| LDL           | Alc        | LA         | 9-HODE         | 590 (440, 790)           | 540 (400, 730)           | -6 (-21, 12)                         | 0.46              |
| LDL           | Alc        | LA         | 13-HODE        | 2790 (2080, 3750)        | 2660 (1980, 3580)        | .                                    | .                 |
| VLDL          | Alc        | LA         | 9-HODE         | 570 (380, 870)           | 630 (420, 950)           | 9 (-19, 46)                          | 0.57              |
| VLDL          | Alc        | LA         | 13-HODE        | 2690 (1780, 4070)        | 2890 (1910, 4370)        | .                                    | .                 |
| <b>Plasma</b> | <b>Alc</b> | <b>LA</b>  | <b>9-HODE</b>  | <b>380 (300, 470)</b>    | <b>440 (350, 550)</b>    | <b>15 (2, 29)</b>                    | <b>0.03</b>       |
| <b>Plasma</b> | <b>Alc</b> | <b>LA</b>  | <b>13-HODE</b> | <b>1660 (1330, 2080)</b> | <b>1890 (1510, 2360)</b> | .                                    | .                 |
| HDL           | Alc        | aLA        | 9-HOTE         | 4.1 (3.0, 5.7)           | 5.0 (3.7, 6.9)           | 14 (-9, 43)                          | 0.26              |
| HDL           | Alc        | aLA        | 13-HOTE        | 6.1 (4.5, 8.4)           | 6.5 (4.8, 9.0)           | .                                    | .                 |
| LDL           | Alc        | aLA        | 9-HOTE         | 5.0 (3.6, 7.1)           | 5.5 (3.9, 7.8)           | 4 (-15, 27)                          | 0.72              |
| LDL           | Alc        | aLA        | 13-HOTE        | 4.3 (3.1, 6.1)           | 4.2 (3.0, 5.9)           | .                                    | .                 |
| VLDL          | Alc        | aLA        | 9-HOTE         | 18.6 (11.7, 29.5)        | 22.0 (13.9, 35.0)        | 15 (-20, 66)                         | 0.43              |
| VLDL          | Alc        | aLA        | 13-HOTE        | 17.2 (10.8, 27.2)        | 19.2 (12.1, 30.5)        | .                                    | .                 |
| Plasma        | Alc        | aLA        | 9-HOTE         | 7.8 (5.7, 10.6)          | 9.1 (6.7, 12.4)          | 15 (-7, 42)                          | 0.18              |
| Plasma        | Alc        | aLA        | 13-HOTE        | 10.4 (7.6, 14.2)         | 11.9 (8.7, 16.2)         | .                                    | .                 |
| HDL           | Alc        | dgLA       | 15(S)-HETrE    | 38 (30, 49)              | 35 (27, 44)              | -10 (-31, 18)                        | 0.41              |
| LDL           | Alc        | dgLA       | 15(S)-HETrE    | 26 (18, 39)              | 20 (14, 30)              | -22 (-47, 16)                        | 0.2               |
| VLDL          | Alc        | dgLA       | 15(S)-HETrE    | 24 (16, 36)              | 18 (12, 27)              | -25 (-59, 36)                        | 0.32              |
| Plasma        | Alc        | dgLA       | 15(S)-HETrE    | 26 (19, 35)              | 24 (18, 32)              | -8 (-34, 29)                         | 0.62              |
| <b>HDL</b>    | <b>Alc</b> | <b>AA</b>  | <b>5-HETE</b>  | <b>208 (162, 267)</b>    | <b>172 (134, 220)</b>    | <b>-15 (-24, -4)</b>                 | <b>0.01</b>       |
| <b>HDL</b>    | <b>Alc</b> | <b>AA</b>  | <b>9-HETE</b>  | <b>168 (131, 216)</b>    | <b>155 (121, 199)</b>    | .                                    | .                 |
| <b>HDL</b>    | <b>Alc</b> | <b>AA</b>  | <b>12-HETE</b> | <b>165 (129, 212)</b>    | <b>135 (105, 173)</b>    | .                                    | .                 |
| <b>HDL</b>    | <b>Alc</b> | <b>AA</b>  | <b>15-HETE</b> | <b>554 (432, 711)</b>    | <b>478 (373, 613)</b>    | .                                    | .                 |
| <b>LDL</b>    | <b>Alc</b> | <b>AA</b>  | <b>5-HETE</b>  | <b>162 (125, 211)</b>    | <b>119 (92, 155)</b>     | <b>-29 (-36, -21)</b>                | <b>&lt;0.0001</b> |
| <b>LDL</b>    | <b>Alc</b> | <b>AA</b>  | <b>9-HETE</b>  | <b>137 (105, 177)</b>    | <b>104 (80, 135)</b>     | .                                    | .                 |
| <b>LDL</b>    | <b>Alc</b> | <b>AA</b>  | <b>12-HETE</b> | <b>104 (80, 134)</b>     | <b>74 (57, 96)</b>       | .                                    | .                 |
| <b>LDL</b>    | <b>Alc</b> | <b>AA</b>  | <b>15-HETE</b> | <b>327 (252, 424)</b>    | <b>211 (163, 274)</b>    | .                                    | .                 |
| <b>VLDL</b>   | <b>Alc</b> | <b>AA</b>  | <b>5-HETE</b>  | <b>112 (72, 175)</b>     | <b>88 (56, 138)</b>      | <b>-18 (-32, 0)</b>                  | <b>0.05</b>       |
| <b>VLDL</b>   | <b>Alc</b> | <b>AA</b>  | <b>9-HETE</b>  | <b>81 (52, 127)</b>      | <b>69 (44, 107)</b>      | .                                    | .                 |
| <b>VLDL</b>   | <b>Alc</b> | <b>AA</b>  | <b>12-HETE</b> | <b>54 (34, 84)</b>       | <b>43 (28, 67)</b>       | .                                    | .                 |
| <b>VLDL</b>   | <b>Alc</b> | <b>AA</b>  | <b>15-HETE</b> | <b>162 (104, 254)</b>    | <b>138 (88, 215)</b>     | .                                    | .                 |
| Plasma        | Alc        | AA         | 5-HETE         | 121 (90, 163)            | 120 (89, 162)            | -4 (-17, 10)                         | 0.55              |
| Plasma        | Alc        | AA         | 9-HETE         | 56 (41, 75)              | 54 (40, 73)              | .                                    | .                 |
| Plasma        | Alc        | AA         | 12-HETE        | 62 (46, 83)              | 55 (41, 74)              | .                                    | .                 |
| Plasma        | Alc        | AA         | 15-HETE        | 310 (231, 417)           | 304 (226, 410)           | .                                    | .                 |
| <b>HDL</b>    | <b>Alc</b> | <b>EPA</b> | <b>5-HEPE</b>  | <b>14.7 (10.6, 20.3)</b> | <b>53.1 (38.4, 73.4)</b> | <b>294 (212, 397)</b>                | <b>&lt;0.0001</b> |
| <b>HDL</b>    | <b>Alc</b> | <b>EPA</b> | <b>12-HEPE</b> | <b>10.3 (7.4, 14.2)</b>  | <b>42.9 (31.1, 59.3)</b> | .                                    | .                 |
| <b>HDL</b>    | <b>Alc</b> | <b>EPA</b> | <b>15-HEPE</b> | <b>3.6 (2.6, 5)</b>      | <b>14.6 (10.5, 20.1)</b> | .                                    | .                 |
| <b>LDL</b>    | <b>Alc</b> | <b>EPA</b> | <b>5-HEPE</b>  | <b>10.9 (7.8, 15.2)</b>  | <b>42.2 (30.2, 58.9)</b> | <b>303 (232, 391)<sup>a</sup></b>    | <b>&lt;0.0001</b> |

|               |            |            |                 |                         |                          |                                   |                   |
|---------------|------------|------------|-----------------|-------------------------|--------------------------|-----------------------------------|-------------------|
| <b>LDL</b>    | <b>Alc</b> | <b>EPA</b> | <b>12-HEPE</b>  | <b>7 (5, 9.8)</b>       | <b>28.4 (20.4, 39.7)</b> | .                                 | .                 |
| <b>LDL</b>    | <b>Alc</b> | <b>EPA</b> | <b>15-HEPE</b>  | <b>2.3 (1.7, 3.3)</b>   | <b>9.9 (7.1, 13.8)</b>   | .                                 | .                 |
| <b>VLDL</b>   | <b>Alc</b> | <b>EPA</b> | <b>5-HEPE</b>   | <b>10.2 (6, 17.2)</b>   | <b>47 (27.8, 79.6)</b>   | <b>352 (228, 522)<sup>a</sup></b> | <b>&lt;0.0001</b> |
| <b>VLDL</b>   | <b>Alc</b> | <b>EPA</b> | <b>12-HEPE</b>  | <b>5.5 (3.2, 9.2)</b>   | <b>23.4 (13.9, 39.6)</b> | .                                 | .                 |
| <b>VLDL</b>   | <b>Alc</b> | <b>EPA</b> | <b>15-HEPE</b>  | <b>1.8 (1.1, 3.1)</b>   | <b>8.6 (5.1, 14.5)</b>   | .                                 | .                 |
| <b>Plasma</b> | <b>Alc</b> | <b>EPA</b> | <b>5-HEPE</b>   | <b>12.6 (8.9, 17.9)</b> | <b>61.7 (43.5, 87.5)</b> | <b>400 (313, 505)</b>             | <b>&lt;0.0001</b> |
| <b>Plasma</b> | <b>Alc</b> | <b>EPA</b> | <b>12-HEPE</b>  | <b>6.5 (4.6, 9.2)</b>   | <b>30.6 (21.6, 43.4)</b> | .                                 | .                 |
| <b>Plasma</b> | <b>Alc</b> | <b>EPA</b> | <b>15-HEPE</b>  | <b>2.2 (1.6, 3.2)</b>   | <b>12.1 (8.6, 17.2)</b>  | .                                 | .                 |
| <b>HDL</b>    | <b>Alc</b> | <b>DHA</b> | <b>17-HDoHE</b> | <b>134 (101, 178)</b>   | <b>276 (208, 367)</b>    | <b>106 (23, 244)</b>              | <b>0.009</b>      |
| <b>LDL</b>    | <b>Alc</b> | <b>DHA</b> | <b>17-HDoHE</b> | <b>48 (35, 67)</b>      | <b>85 (61, 117)</b>      | <b>75 (24, 149)</b>               | <b>0.004</b>      |
| <b>VLDL</b>   | <b>Alc</b> | <b>DHA</b> | <b>17-HDoHE</b> | <b>42 (26, 67)</b>      | <b>135 (84, 215)</b>     | <b>220 (57, 552)<sup>a</sup></b>  | <b>0.003</b>      |
| <b>Plasma</b> | <b>Alc</b> | <b>DHA</b> | <b>17-HDoHE</b> | <b>71 (50, 102)</b>     | <b>183 (128, 264)</b>    | <b>157 (71, 287)</b>              | <b>0.0002</b>     |
| HDL           | Ket        | LA         | 9-KODE          | 109 (91, 131)           | 109 (91, 131)            | 0 (-15, 17)                       | 0.97              |
| LDL           | Ket        | LA         | 9-KODE          | 191 (153, 238)          | 181 (145, 226)           | -5 (-24, 18)                      | 0.61              |
| VLDL          | Ket        | LA         | 9-KODE          | 284 (197, 408)          | 319 (221, 459)           | 12 (-32, 85)                      | 0.63              |
| Plasma        | Ket        | LA         | 9-KODE          | 89 (64, 124)            | 100 (71, 139)            | 12 (-13, 44)                      | 0.35              |
| <b>HDL</b>    | <b>Ket</b> | <b>AA</b>  | <b>5-KETE</b>   | <b>38 (27, 53)</b>      | <b>28 (20, 39)</b>       | <b>-32 (-45, -17)</b>             | <b>0.0004</b>     |
| <b>HDL</b>    | <b>Ket</b> | <b>AA</b>  | <b>15-KETE</b>  | <b>92 (66, 128)</b>     | <b>57 (41, 79)</b>       | .                                 | .                 |
| <b>LDL</b>    | <b>Ket</b> | <b>AA</b>  | <b>5-KETE</b>   | <b>44 (33, 58)</b>      | <b>32 (24, 43)</b>       | <b>-32 (-42, -20)</b>             | <b>&lt;0.0001</b> |
| <b>LDL</b>    | <b>Ket</b> | <b>AA</b>  | <b>15-KETE</b>  | <b>132 (99, 175)</b>    | <b>82 (62, 110)</b>      | .                                 | .                 |
| VLDL          | Ket        | AA         | 5-KETE          | 45 (27, 75)             | 38 (23, 63)              | -20 (-44, 16)                     | 0.23              |
| VLDL          | Ket        | AA         | 15-KETE         | 245 (148, 407)          | 188 (114, 313)           | .                                 | .                 |
| Plasma        | Ket        | AA         | 5-KETE          | 52 (36, 74)             | 47 (33, 68)              | -10 (-30, 15)                     | 0.39              |
| Plasma        | Ket        | AA         | 15-KETE         | 266 (185, 381)          | 234 (163, 336)           | .                                 | .                 |
| HDL           | Leuko      | AA         | 6-trans-LTB4    | .                       | .                        | .                                 | .                 |
| LDL           | Leuko      | AA         | 6-trans-LTB4    | 0.15 (0.10, 0.20)       | 0.12 (0.09, 0.17)        | -14 (-47, 39)                     | 0.50              |
| VLDL          | Leuko      | AA         | 6-trans-LTB4    | 0.078 (0.045, 0.134)    | 0.073 (0.043, 0.127)     | -6 (-57, 106)                     | 0.88              |
| Plasma        | Leuko      | AA         | 6-trans-LTB4    | 0.078 (0.057, 0.109)    | 0.075 (0.054, 0.104)     | -4 (-33, 37)                      | 0.8               |
| HDL           | Epox       | LA         | 9(10)-EpOME     | 273 (210, 355)          | 273 (210, 354)           | 1 (-13, 19)                       | 0.86              |
| HDL           | Epox       | LA         | 12(13)-EpOME    | 328 (253, 426)          | 338 (260, 438)           | .                                 | .                 |
| LDL           | Epox       | LA         | 9(10)-EpOME     | 237 (188, 300)          | 236 (187, 299)           | -2 (-13, 11)                      | 0.78              |
| LDL           | Epox       | LA         | 12(13)-EpOME    | 300 (237, 379)          | 291 (230, 367)           | .                                 | .                 |
| VLDL          | Epox       | LA         | 9(10)-EpOME     | 269 (194, 374)          | 277 (199, 385)           | 5 (-19, 35)                       | 0.71              |
| VLDL          | Epox       | LA         | 12(13)-EpOME    | 324 (233, 451)          | 347 (250, 482)           | .                                 | .                 |
| Plasma        | Epox       | LA         | 9(10)-EpOME     | 134 (99, 181)           | 152 (112, 205)           | 9 (-10, 33)                       | 0.38              |
| Plasma        | Epox       | LA         | 12(13)-EpOME    | 157 (116, 212)          | 165 (122, 223)           | .                                 | .                 |
| HDL           | Epox       | aLA        | 9(10)-EpODE     | 19.4 (12.3, 30.6)       | 20.5 (13, 32.4)          | 7 (-18, 40)                       | 0.62              |
| HDL           | Epox       | aLA        | 12(13)-EpODE    | 4.1 (2.6, 6.4)          | 4.6 (2.9, 7.3)           | .                                 | .                 |
| HDL           | Epox       | aLA        | 15(16)-EpODE    | 17.6 (11.2, 27.8)       | 18.1 (11.5, 28.5)        | .                                 | .                 |
| LDL           | Epox       | aLA        | 9(10)-EpODE     | 15.2 (12.3, 18.7)       | 14.4 (11.6, 17.8)        | -4 (-17, 12)                      | 0.62              |
| LDL           | Epox       | aLA        | 12(13)-EpODE    | 2.1 (1.7, 2.5)          | 2.1 (1.7, 2.6)           | .                                 | .                 |
| LDL           | Epox       | aLA        | 15(16)-EpODE    | 16 (12.9, 19.7)         | 14.8 (11.9, 18.3)        | .                                 | .                 |
| VLDL          | Epox       | aLA        | 9(10)-EpODE     | 48 (32.5, 70.8)         | 56.4 (38.2, 83.2)        | 21 (-4, 51)                       | 0.10              |
| VLDL          | Epox       | aLA        | 12(13)-EpODE    | 6.4 (4.3, 9.4)          | 8.2 (5.5, 12.1)          | .                                 | .                 |

|               |             |            |                      |                          |                           |                       |                   |
|---------------|-------------|------------|----------------------|--------------------------|---------------------------|-----------------------|-------------------|
| VLDL          | Epox        | aLA        | 15(16)-EpODE         | 50.2 (34, 74.1)          | 58.4 (39.6, 86.2)         | .                     | .                 |
| Plasma        | Epox        | aLA        | 9(10)-EpODE          | 28.2 (20.5, 38.7)        | 31.5 (22.9, 43.3)         | 11 (-5, 30)           | 0.17              |
| Plasma        | Epox        | aLA        | 12(13)-EpODE         | 2.5 (1.8, 3.5)           | 2.9 (2.1, 4.0)            | .                     | .                 |
| Plasma        | Epox        | aLA        | 15(16)-EpODE         | 29.4 (21.4, 40.4)        | 31.5 (22.9, 43.3)         | .                     | .                 |
| <b>HDL</b>    | <b>Epox</b> | <b>AA</b>  | <b>8(9)-EpETrE</b>   | <b>106 (75, 150)</b>     | <b>77 (54, 109)</b>       | <b>-23 (-33, -12)</b> | <b>0.0004</b>     |
| <b>HDL</b>    | <b>Epox</b> | <b>AA</b>  | <b>11(12)-EpETrE</b> | <b>262 (185, 372)</b>    | <b>207 (146, 293)</b>     | .                     | .                 |
| <b>HDL</b>    | <b>Epox</b> | <b>AA</b>  | <b>14(15)-EpETrE</b> | <b>208 (147, 295)</b>    | <b>165 (116, 234)</b>     | .                     | .                 |
| <b>LDL</b>    | <b>Epox</b> | <b>AA</b>  | <b>8(9)-EpETrE</b>   | <b>55 (41, 74)</b>       | <b>39 (29, 53)</b>        | <b>-27 (-35, -19)</b> | <b>&lt;0.0001</b> |
| <b>LDL</b>    | <b>Epox</b> | <b>AA</b>  | <b>11(12)-EpETrE</b> | <b>131 (97, 175)</b>     | <b>101 (75, 135)</b>      | .                     | .                 |
| <b>LDL</b>    | <b>Epox</b> | <b>AA</b>  | <b>14(15)-EpETrE</b> | <b>114 (85, 153)</b>     | <b>81 (60, 109)</b>       | .                     | .                 |
| VLDL          | Epox        | AA         | 8(9)-EpETrE          | 39 (25, 60)              | 35 (23, 54)               | -9 (-24, 9)           | 0.31              |
| VLDL          | Epox        | AA         | 11(12)-EpETrE        | 88 (57, 137)             | 79 (51, 122)              | .                     | .                 |
| VLDL          | Epox        | AA         | 14(15)-EpETrE        | 73 (47, 113)             | 69 (44, 106)              | .                     | .                 |
| Plasma        | Epox        | AA         | 8(9)-EpETrE          | 39 (28, 54)              | 34 (25, 48)               | -8 (-19, 6)           | 0.24              |
| Plasma        | Epox        | AA         | 11(12)-EpETrE        | 87 (62, 120)             | 80 (58, 112)              | .                     | .                 |
| Plasma        | Epox        | AA         | 14(15)-EpETrE        | 70 (50, 97)              | 68 (49, 94)               | .                     | .                 |
| <b>HDL</b>    | <b>Epox</b> | <b>EPA</b> | <b>14(15)-EpETE</b>  | <b>10.5 (6.4, 17.2)</b>  | <b>43.2 (26.8, 69.8)</b>  | <b>325 (184, 536)</b> | <b>&lt;0.0001</b> |
| <b>HDL</b>    | <b>Epox</b> | <b>EPA</b> | <b>17(18)-EpETE</b>  | <b>18.7 (11.7, 29.8)</b> | <b>81.7 (51.3, 130.2)</b> | .                     | .                 |
| <b>LDL</b>    | <b>Epox</b> | <b>EPA</b> | <b>14(15)-EpETE</b>  | <b>5.1 (3.5, 7.5)</b>    | <b>22.7 (15.5, 33.4)</b>  | <b>318 (224, 439)</b> | <b>&lt;0.0001</b> |
| <b>LDL</b>    | <b>Epox</b> | <b>EPA</b> | <b>17(18)-EpETE</b>  | <b>10.4 (7.1, 15.3)</b>  | <b>41.1 (28, 60.3)</b>    | .                     | .                 |
| <b>VLDL</b>   | <b>Epox</b> | <b>EPA</b> | <b>14(15)-EpETE</b>  | <b>5.0 (3.0, 8.5)</b>    | <b>22.7 (13.4, 38.3)</b>  | <b>379 (236, 584)</b> | <b>&lt;0.0001</b> |
| <b>VLDL</b>   | <b>Epox</b> | <b>EPA</b> | <b>17(18)-EpETE</b>  | <b>6.4 (3.8, 10.8)</b>   | <b>32.5 (19.2, 54.8)</b>  | .                     | .                 |
| <b>Plasma</b> | <b>Epox</b> | <b>EPA</b> | <b>14(15)-EpETE</b>  | <b>2.4 (1.6, 3.6)</b>    | <b>13.6 (8.9, 20.8)</b>   | <b>436 (307, 606)</b> | <b>&lt;0.0001</b> |
| <b>Plasma</b> | <b>Epox</b> | <b>EPA</b> | <b>17(18)-EpETE</b>  | <b>6.0 (3.9, 9.1)</b>    | <b>29.8 (19.5, 45.5)</b>  | .                     | .                 |
| <b>HDL</b>    | <b>Epox</b> | <b>DHA</b> | <b>16(17)-EpDPE</b>  | <b>43 (27, 67)</b>       | <b>77 (49, 121)</b>       | <b>81 (7, 206)</b>    | <b>0.03</b>       |
| <b>LDL</b>    | <b>Epox</b> | <b>DHA</b> | <b>16(17)-EpDPE</b>  | <b>18 (12, 26)</b>       | <b>29 (19, 43)</b>        | <b>63 (-8, 188)</b>   | <b>0.09</b>       |
| <b>VLDL</b>   | <b>Epox</b> | <b>DHA</b> | <b>16(17)-EpDPE</b>  | <b>14 (8, 24)</b>        | <b>56 (33, 95)</b>        | <b>304 (107, 690)</b> | <b>0.0005</b>     |
| <b>Plasma</b> | <b>Epox</b> | <b>DHA</b> | <b>16(17)-EpDPE</b>  | <b>16 (11, 25)</b>       | <b>46 (30, 70)</b>        | <b>182 (73, 358)</b>  | <b>0.004</b>      |
| HDL           | Diol        | LA         | 9,10-DiHOME          | 46 (36, 59)              | 45 (35, 59)               | 2 (-18, 27)           | 0.86              |
| HDL           | Diol        | LA         | 12,13-DiHOME         | 8.5 (6.6, 11)            | 8.9 (6.9, 11.4)           | .                     | .                 |
| LDL           | Diol        | LA         | 9,10-DiHOME          | 20 (16, 25)              | 18 (14, 22)               | -4 (-18, 13)          | 0.63              |
| LDL           | Diol        | LA         | 12,13-DiHOME         | 3.4 (2.8, 4.3)           | 3.6 (2.9, 4.4)            | .                     | .                 |
| VLDL          | Diol        | LA         | 9,10-DiHOME          | 16 (11, 24)              | 17 (11, 25)               | 21 (-13, 67)          | 0.25              |
| VLDL          | Diol        | LA         | 12,13-DiHOME         | 2.3 (1.6, 3.5)           | 3.2 (2.1, 4.9)            | .                     | .                 |
| <b>Plasma</b> | <b>Diol</b> | <b>LA</b>  | <b>9,10-DiHOME</b>   | <b>21 (17, 28)</b>       | <b>24 (19, 31)</b>        | <b>24 (1, 52)</b>     | <b>0.04</b>       |
| <b>Plasma</b> | <b>Diol</b> | <b>LA</b>  | <b>12,13-DiHOME</b>  | <b>1.6 (1.3, 2.1)</b>    | <b>2.3 (1.8, 2.9)</b>     | .                     | .                 |
| HDL           | Diol        | aLA        | 9,10-DiHODE          | .                        | .                         | .                     | .                 |
| LDL           | Diol        | aLA        | 9,10-DiHODE          | .                        | .                         | .                     | .                 |
| VLDL          | Diol        | aLA        | 9,10-DiHODE          | 0.07 (0.04, 0.14)        | 0.09 (0.04, 0.17)         | 19 (-54, 207)         | 0.7               |
| Plasma        | Diol        | aLA        | 9,10-DiHODE          | 0.08 (0.06, 0.13)        | 0.10 (0.07, 0.16)         | 22 (-27, 105)         | 0.41              |
| <b>HDL</b>    | <b>Diol</b> | <b>AA</b>  | <b>5,6-DiHETrE</b>   | <b>3.54 (2.88, 4.36)</b> | <b>2.63 (2.14, 3.23)</b>  | <b>-22 (-31, -13)</b> | <b>&lt;0.0001</b> |
| <b>HDL</b>    | <b>Diol</b> | <b>AA</b>  | <b>8,9-DiHETrE</b>   | <b>1.89 (1.54, 2.33)</b> | <b>1.38 (1.12, 1.69)</b>  | .                     | .                 |
| <b>HDL</b>    | <b>Diol</b> | <b>AA</b>  | <b>11,12-DiHETrE</b> | <b>0.60 (0.49, 0.74)</b> | <b>0.44 (0.36, 0.55)</b>  | .                     | .                 |
| <b>HDL</b>    | <b>Diol</b> | <b>AA</b>  | <b>14,15-DiHETrE</b> | <b>0.50 (0.40, 0.61)</b> | <b>0.45 (0.37, 0.55)</b>  | .                     | .                 |

|               |             |            |                      |                          |                          |                       |                   |
|---------------|-------------|------------|----------------------|--------------------------|--------------------------|-----------------------|-------------------|
| <b>LDL</b>    | <b>Diol</b> | <b>AA</b>  | <b>5,6-DiHETrE</b>   | <b>4.31 (3.47, 5.36)</b> | <b>3.09 (2.49, 3.84)</b> | <b>-28 (-34, -21)</b> | <b>&lt;0.0001</b> |
| <b>LDL</b>    | <b>Diol</b> | <b>AA</b>  | <b>8,9-DiHETrE</b>   | <b>1.62 (1.30, 2.01)</b> | <b>1.12 (0.90, 1.39)</b> | .                     | .                 |
| <b>LDL</b>    | <b>Diol</b> | <b>AA</b>  | <b>11,12-DiHETrE</b> | <b>0.55 (0.44, 0.68)</b> | <b>0.38 (0.30, 0.47)</b> | .                     | .                 |
| <b>LDL</b>    | <b>Diol</b> | <b>AA</b>  | <b>14,15-DiHETrE</b> | <b>0.38 (0.31, 0.48)</b> | <b>0.30 (0.24, 0.38)</b> | .                     | .                 |
| <b>VLDL</b>   | <b>Diol</b> | <b>AA</b>  | <b>5,6-DiHETrE</b>   | <b>2.66 (1.67, 4.22)</b> | <b>2.20 (1.39, 3.49)</b> | <b>-19 (-34, -2)</b>  | <b>0.03</b>       |
| <b>VLDL</b>   | <b>Diol</b> | <b>AA</b>  | <b>8,9-DiHETrE</b>   | <b>1.10 (0.69, 1.74)</b> | <b>0.79 (0.50, 1.26)</b> | .                     | .                 |
| <b>VLDL</b>   | <b>Diol</b> | <b>AA</b>  | <b>11,12-DiHETrE</b> | <b>0.37 (0.23, 0.58)</b> | <b>0.28 (0.18, 0.45)</b> | .                     | .                 |
| <b>VLDL</b>   | <b>Diol</b> | <b>AA</b>  | <b>14,15-DiHETrE</b> | <b>0.27 (0.17, 0.43)</b> | <b>0.24 (0.15, 0.39)</b> | .                     | .                 |
| Plasma        | Diol        | AA         | 5,6-DiHETrE          | 2.93 (2.33, 3.68)        | 2.51 (2.00, 3.15)        | -7 (-15, 2)           | 0.12              |
| Plasma        | Diol        | AA         | 8,9-DiHETrE          | 1.17 (0.93, 1.47)        | 1.10 (0.88, 1.39)        | .                     | .                 |
| Plasma        | Diol        | AA         | 11,12-DiHETrE        | 0.37 (0.29, 0.46)        | 0.32 (0.26, 0.41)        | .                     | .                 |
| Plasma        | Diol        | AA         | 14,15-DiHETrE        | 0.24 (0.19, 0.31)        | 0.25 (0.20, 0.32)        | .                     | .                 |
| <b>HDL</b>    | <b>Diol</b> | <b>EPA</b> | <b>14,15-DiHETE</b>  | <b>1.01 (0.69, 1.48)</b> | <b>1.85 (1.33, 2.57)</b> | <b>49 (2, 118)</b>    | <b>0.04</b>       |
| <b>HDL</b>    | <b>Diol</b> | <b>EPA</b> | <b>17,18-DiHETE</b>  | <b>4.26 (2.99, 6.08)</b> | <b>5.17 (3.64, 7.34)</b> | .                     | .                 |
| <b>LDL</b>    | <b>Diol</b> | <b>EPA</b> | <b>14,15-DiHETE</b>  | <b>0.41 (0.27, 0.61)</b> | <b>0.83 (0.56, 1.24)</b> | <b>97 (46, 166)</b>   | <b>&lt;0.0001</b> |
| <b>LDL</b>    | <b>Diol</b> | <b>EPA</b> | <b>17,18-DiHETE</b>  | <b>0.60 (0.38, 0.95)</b> | <b>1.13 (0.75, 1.70)</b> | .                     | .                 |
| <b>VLDL</b>   | <b>Diol</b> | <b>EPA</b> | <b>14,15-DiHETE</b>  | <b>0.33 (0.22, 0.50)</b> | <b>1.08 (0.71, 1.63)</b> | <b>109 (47, 196)</b>  | <b>0.0001</b>     |
| <b>VLDL</b>   | <b>Diol</b> | <b>EPA</b> | <b>17,18-DiHETE</b>  | <b>0.68 (0.45, 1.05)</b> | <b>0.90 (0.59, 1.36)</b> | .                     | .                 |
| <b>Plasma</b> | <b>Diol</b> | <b>EPA</b> | <b>14,15-DiHETE</b>  | <b>0.22 (0.15, 0.32)</b> | <b>0.68 (0.47, 0.98)</b> | <b>158 (99, 235)</b>  | <b>&lt;0.0001</b> |
| <b>Plasma</b> | <b>Diol</b> | <b>EPA</b> | <b>17,18-DiHETE</b>  | <b>0.31 (0.21, 0.45)</b> | <b>0.64 (0.44, 0.94)</b> | .                     | .                 |
| HDL           | Diol        | DHA        | 19,20-DiHDPA         | 0.36 (0.24, 0.56)        | 0.33 (0.21, 0.51)        | -9 (-44, 49)          | 0.70              |
| <b>LDL</b>    | <b>Diol</b> | <b>DHA</b> | <b>19,20-DiHDPA</b>  | <b>0.06 (0.04, 0.09)</b> | <b>0.12 (0.08, 0.17)</b> | <b>104 (55, 168)</b>  | <b>0.0001</b>     |
| <b>VLDL</b>   | <b>Diol</b> | <b>DHA</b> | <b>19,20-DiHDPA</b>  | <b>0.08 (0.05, 0.13)</b> | <b>0.22 (0.14, 0.37)</b> | <b>180 (44, 443)</b>  | <b>0.01</b>       |
| <b>Plasma</b> | <b>Diol</b> | <b>DHA</b> | <b>19,20-DiHDPA</b>  | <b>0.06 (0.04, 0.08)</b> | <b>0.16 (0.12, 0.22)</b> | <b>162 (92, 258)</b>  | <b>&lt;0.0001</b> |
| HDL           | PG          | AA         | PGF2a                | .                        | .                        | .                     | .                 |
| LDL           | PG          | AA         | PGF2a                | 0.35 (0.20, 0.60)        | 0.34 (0.20, 0.58)        | -2 (-40, 59)          | 0.91              |
| VLDL          | PG          | AA         | PGF2a                | 0.69 (0.44, 1.07)        | 0.45 (0.28, 0.71)        | -35 (-64, 17)         | 0.14              |
| Plasma        | PG          | AA         | PGF2a                | 0.84 (0.58, 1.21)        | 0.59 (0.40, 0.85)        | -30 (-53, 4)          | 0.07              |
| HDL           | Triol       | LA         | 9,10-13-TriHOME      | 5.6 (3.3, 9.5)           | 5.9 (3.6, 9.6)           | 19 (-18, 73)          | 0.34              |
| HDL           | Triol       | LA         | 9,12,13-TriHOME      | 13.6 (8.6, 21.5)         | 17.8 (11.4, 27.8)        | .                     | .                 |
| LDL           | Triol       | LA         | 9,10-13-TriHOME      | 1.5 (0.9, 2.4)           | 1.7 (1.1, 2.7)           | 11 (-17, 48)          | 0.49              |
| LDL           | Triol       | LA         | 9,12,13-TriHOME      | 5.0 (3.1, 8.1)           | 5.4 (3.4, 8.6)           | .                     | .                 |
| VLDL          | Triol       | LA         | 9,10-13-TriHOME      | 1.7 (1.2, 2.5)           | 1.9 (1.3, 2.8)           | 8 (-21, 48)           | 0.62              |
| VLDL          | Triol       | LA         | 9,12,13-TriHOME      | 5.4 (3.7, 7.9)           | 5.7 (3.9, 8.3)           | .                     | .                 |
| Plasma        | Triol       | LA         | 9,10-13-TriHOME      | 1.0 (0.7, 1.5)           | 1.2 (0.9, 1.8)           | 16 (-6, 44)           | 0.17              |
| Plasma        | Triol       | LA         | 9,12,13-TriHOME      | 3.1 (2.2, 4.5)           | 3.5 (2.5, 5.0)           | .                     | .                 |
| HDL           | EpKet       | LA         | EKODE                | 57 (45, 71)              | 58 (46, 73)              | 2 (-21, 31)           | 0.87              |
| LDL           | EpKet       | LA         | EKODE                | 92 (72, 117)             | 86 (68, 110)             | -6 (-25, 17)          | 0.56              |
| VLDL          | EpKet       | LA         | EKODE                | 126 (88, 183)            | 139 (96, 201)            | 10 (-33, 81)          | 0.69              |
| Plasma        | EpKet       | LA         | EKODE                | 50 (39, 64)              | 53 (41, 68)              | 6 (-19, 39)           | 0.63              |

<sup>a</sup> The adjustment for age was significant (P<0.05).

**Supplemental Table 2:** Correlation between oxylipins and erythrocyte content of parent fatty acid.

| Oxylipin      | Visit    | Pearson Correlation       |             |             |             | Oxylipin             | Pearson Correlation |             |             |             |
|---------------|----------|---------------------------|-------------|-------------|-------------|----------------------|---------------------|-------------|-------------|-------------|
|               |          | HDL                       | LDL         | VLDL        | Plasma      |                      | HDL                 | LDL         | VLDL        | Plasma      |
|               |          | <b>Mid-chain alcohols</b> |             |             |             | <b>Ketones</b>       |                     |             |             |             |
|               |          | <i>Arachidonates</i>      |             |             |             |                      |                     |             |             |             |
| 5-HETE        | Baseline | <b>0.79</b>               |             |             |             | 5-KETE               |                     |             |             |             |
|               | Final    |                           |             |             |             |                      |                     |             |             |             |
| 9-HETE        | Baseline | <b>0.58</b>               |             |             |             |                      |                     |             |             |             |
|               | Final    |                           |             |             |             |                      |                     |             |             |             |
| 12-HETE       | Baseline |                           |             |             |             |                      |                     |             |             |             |
|               | Final    |                           |             |             |             |                      |                     |             |             |             |
| 15-HETE       | Baseline | <b>0.69</b>               |             |             |             | 15-KETE              |                     |             |             |             |
|               | Final    |                           |             |             |             |                      |                     |             |             |             |
|               |          | <i>Eicosapentaenoates</i> |             |             |             |                      |                     |             |             |             |
| 5-HEPE        | Baseline |                           | <b>0.67</b> | <b>0.80</b> | <b>0.85</b> |                      |                     |             |             |             |
|               | Final    | <b>0.88</b>               | <b>0.58</b> | <b>0.59</b> | <b>0.81</b> |                      |                     |             |             |             |
| 12-HEPE       | Baseline | <b>0.53</b>               | <b>0.63</b> | <b>0.72</b> | <b>0.63</b> |                      |                     |             |             |             |
|               | Final    | <b>0.85</b>               | <b>0.68</b> | <b>0.72</b> | <b>0.81</b> |                      |                     |             |             |             |
| 15-HEPE       | Baseline | <b>0.64</b>               | <b>0.57</b> | <b>0.72</b> | <b>0.74</b> |                      |                     |             |             |             |
|               | Final    | <b>0.82</b>               | <b>0.60</b> | <b>0.69</b> | <b>0.77</b> |                      |                     |             |             |             |
|               |          | <i>Docosahexaenoates</i>  |             |             |             |                      |                     |             |             |             |
| 17-HDoHE      | Baseline |                           | <b>0.60</b> |             | <b>0.64</b> |                      |                     |             |             |             |
|               | Final    | <b>0.63</b>               |             |             |             |                      |                     |             |             |             |
|               |          | <b>Epoxides</b>           |             |             |             | <b>Vicinal Diols</b> |                     |             |             |             |
|               |          | <i>Arachidonates</i>      |             |             |             |                      |                     |             |             |             |
| 8(9)-EpETrE   | Baseline |                           |             |             |             | 8,9-DiHETrE          |                     |             |             |             |
|               | Final    |                           |             |             |             |                      |                     |             |             |             |
| 11(12)-EpETrE | Baseline |                           |             |             |             | 11,12-DiHETrE        |                     |             |             |             |
|               | Final    |                           |             |             |             |                      |                     |             |             |             |
| 14(15)-EpETrE | Baseline |                           |             |             |             | 14,15-DiHETrE        |                     |             |             |             |
|               | Final    |                           |             |             |             |                      |                     |             |             |             |
|               |          | <i>Eicosapentaenoates</i> |             |             |             |                      |                     |             |             |             |
| 14(15)-EpETE  | Baseline | <b>0.63</b>               | <b>0.78</b> | <b>0.63</b> | <b>0.56</b> | 14,15-DiHETE         |                     |             | <b>0.80</b> |             |
|               | Final    | <b>0.58</b>               | <b>0.70</b> | <b>0.78</b> | <b>0.76</b> |                      | <b>0.65</b>         | <b>0.63</b> |             | <b>0.88</b> |
| 17(18)-EpETE  | Baseline | <b>0.58</b>               | <b>0.81</b> | <b>0.66</b> | <b>0.70</b> | 17,18-DiHETE         |                     |             | <b>0.65</b> |             |
|               | Final    | <b>0.64</b>               | <b>0.71</b> | <b>0.83</b> | <b>0.81</b> |                      |                     |             | <b>0.69</b> | <b>0.85</b> |
|               |          | <i>Docosahexaenoates</i>  |             |             |             |                      |                     |             |             |             |
| 16(17)-EpDPE  | Baseline |                           | <b>0.81</b> | <b>0.66</b> | <b>0.73</b> | 19,20-DiHDPA         |                     |             |             | <b>0.61</b> |

Pearson correlation on  $\log(\text{nM oxylipin}) \times \log(\text{erythrocyte parent FA as \%total})$

Where the regression coefficient is significant at  $p < 0.05$ , it is represented in **bold**; where  $p > 0.05$ , only color is represented.

Supplemental Table 2; Key

| Key   |                                                                                   |
|-------|-----------------------------------------------------------------------------------|
| r     | Color                                                                             |
| 1.00  |  |
| 0.67  |  |
| 0.33  |  |
| 0.00  |  |
| -0.33 |  |
| -0.67 |  |
| -1.00 |  |

**Supplemental Table 3: Estimation of changes in epoxide bioactivity with concentrations unmeasured epoxides imputed<sup>a</sup>**

|                                | <i>Net potency for vasodilation</i> |              |             |              |             |              |             |              |
|--------------------------------|-------------------------------------|--------------|-------------|--------------|-------------|--------------|-------------|--------------|
|                                | HDL                                 |              | LDL         |              | VLDL        |              | Plasma      |              |
|                                | <i>Bs</i>                           | <i>Final</i> | <i>Bs</i>   | <i>Final</i> | <i>Bs</i>   | <i>Final</i> | <i>Bs</i>   | <i>Final</i> |
| <b>Net AA</b> <sup>[32]</sup>  | 0.99                                | 0.77         | 0.52        | 0.38         | 0.34        | 0.31         | 0.33        | 0.31         |
| <b>Net EPA</b> <sup>[32]</sup> | 0.21                                | 0.85         | 0.11        | 0.44         | 0.09        | 0.41         | 0.06        | 0.28         |
| <b>Net DHA</b> <sup>[31]</sup> | 0.21                                | 0.39         | 0.09        | 0.15         | 0.07        | 0.29         | 0.08        | 0.23         |
| <b>Total</b>                   | <b>1.41</b>                         | <b>2.02</b>  | <b>0.71</b> | <b>0.96</b>  | <b>0.50</b> | <b>1.00</b>  | <b>0.47</b> | <b>0.82</b>  |
| <b>Fold-change</b>             |                                     | <b>1.4</b>   |             | <b>1.4</b>   |             | <b>2.0</b>   |             | <b>1.7</b>   |

<sup>a</sup> imputations were made using the reactivity of each double bond implied by Newman and Hammock [33].

<sup>b</sup> Net potency measured as  $\Sigma -EC_{50} \times [Epoxide]_{measured\ or\ imputed}$  as reported by Ye *et al* & Zhang *et al*.  
*Note*: potencies are measured in nM<sup>2</sup> / mM PL. Abbreviation: Bs – Baseline.
